# Supplementary material
Source: PubMed Central journal article supplement (PMC3078354)
Supplement: 1012302108_pnas.201012302SI.pdf [file 1012302108_pnas.201012302SI.pdf]

# Supporting Information

Oberle and Schaal 10.1073/pnas.1012302108

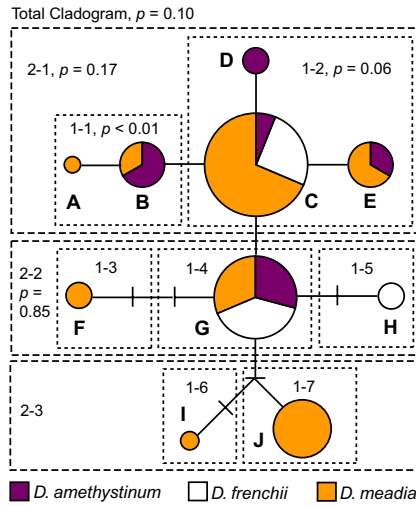

**Fig. S1.** Nested haplotype network representing inferred relationships among *psbA-trnH*<sup>GUG</sup> sequences from all samples. Circle size is proportional to abundance of each haplotype. Lines connecting haplotypes represent inferred mutational differences. Hatches across connecting lines represent unobserved haplotypes. *P* values refer to the significance of the association between haplotype (or haplotype clade) and taxonomic determination (additional methods in text).

Table S1. Summary of material analyzed

| No. | Taxon                  | Locality                                    | Habitat | Latitude | Longitude | SLA    | cpDNA | No. of AFLPs |
|-----|------------------------|---------------------------------------------|---------|----------|-----------|--------|-------|--------------|
| 292 | <i>D. meadia</i>       | Oconee N.F., Green Co., GA                  | Forest  | 33.596   | -83.263   | 289.87 | G     | 10           |
| 294 | <i>D. frenchii</i>     | Cane Creek Canyon, Colbert Co., AL          | Cliff   | 34.640   | -87.808   | 657.07 | G     | 8            |
| 295 | <i>D. meadia</i>       | Kitsatchie N.F., Natchitoches Pa., LA       | Forest  | 31.419   | -93.053   | 447.23 | C     | 9            |
| 297 | <i>D. meadia</i>       | Pontotoc Ridge N.P., Pontotoc Co., OK       | Open    | 34.522   | -96.609   | 198.10 | D     | 10           |
| 298 | <i>D. meadia</i>       | Beaver's Bend S.R.P. McCurtain Co. OK       | Forest  | 34.137   | -94.696   | 431.65 | F     | 9            |
| 299 | <i>D. meadia</i>       | Middle Fork Barrens N.P., Saline Co., AR    | Forest  | 34.640   | -92.840   | 335.46 | C     | 10           |
| 300 | <i>D. frenchii</i>     | Ozark N.F. Newton Co., AR                   | Cliff   | 35.847   | -93.294   | 399.11 | C     | 10           |
| 301 | <i>D. meadia</i>       | Duck River Complex N.A., Maury Co., TN      | Open    | 35.567   | -86.888   | 188.64 | G     | 10           |
| 302 | <i>D. meadia</i>       | Pisgah N.F., Buncombe Co., NC               | Forest  | 35.661   | -82.432   | 242.14 | C     | 9            |
| 304 | <i>D. meadia</i>       | Standing Stone S.P., Overton Co., TN        | Forest  | 36.470   | -85.415   | 220.51 | C     | 10           |
| 305 | <i>D. frenchii</i>     | Stones Creek Hollow, Grayson Co., KY        | Cliff   | 37.532   | -86.407   | 309.31 | G     | 9            |
| 306 | <i>D. meadia</i>       | Logan Co. Glades S.N.P., Logan Co., KY      | Open    | 36.847   | -86.874   | 184.42 | I     | 10           |
| 307 | <i>D. meadia</i>       | Ferne Clyffe S.P., Johnson Co., IL          | Forest  | 37.532   | -88.989   | 229.88 | C     | 10           |
| 308 | <i>D. meadia</i>       | Portland Arch N.P., Fountain Co., IN        | Forest  | 40.211   | -87.332   | 228.27 | I     | 8            |
| 310 | <i>D. frenchii</i>     | Carter Caves S.R.P., Carter Co., KY         | Cliff   | 38.368   | -83.121   | 489.30 | C     | 8            |
| 311 | <i>D. meadia</i>       | FloraCliff N.P., Fayette Co., KY            | Cliff   | 37.905   | -84.364   | 287.06 | C     | 10           |
| 312 | <i>D. frenchii</i>     | Hoosier N.F., Perry Co., IN                 | Cliff   | 38.199   | -86.568   | 524.43 | H     | 10           |
| 313 | <i>D. meadia</i>       | Shawnee N.F., Gallatin Co., IL              | Open    | 37.604   | -88.282   | 227.11 | I     | 9            |
| 314 | <i>D. frenchii</i>     | Shawnee N.F., Jackson Co. IL                | Cliff   | 37.515   | -88.543   | 465.10 | C     | 9            |
| 315 | <i>D. frenchii</i>     | Shawnee N.F., Pope Co. IL                   | Cliff   | 37.668   | -89.363   | 531.70 | G     | 9            |
| 316 | <i>D. meadia</i>       | Perry Co., MO                               | Cliff   | 37.708   | -89.583   | 319.02 | C     | 10           |
| 317 | <i>D. frenchii</i>     | Hickory Canyons, Ste. Genevieve Co., MO     | Cliff   | 37.870   | -90.307   | 394.37 | G     | 10           |
| 318 | <i>D. meadia</i>       | St. Louis Co., MO                           | Forest  | 38.559   | -90.626   | 250.24 | C     | 8            |
| 332 | <i>D. amethystinum</i> | Clark's Hill Norton S.H.S. Osage Co., MO    | Cliff   | 38.561   | -92.026   | 323.13 | G     | 10           |
| 334 | <i>D. meadia</i>       | Taberville Prairie S.N.A. St. Clair Co., MO | Open    | 38.050   | -93.993   | 185.53 | C, G  | 10           |
| 335 | <i>D. frenchii</i>     | Mark Twain N.F., Douglas Co., MO            | Cliff   | 36.992   | -92.094   | 397.67 | C     | 9            |
| 336 | <i>D. meadia</i>       | Mark Twain N.F., Taney Co., MO              | Open    | 36.731   | -92.848   | 185.83 | G, J  | 10           |
| 337 | <i>D. meadia</i>       | Naked Mountain N.P., Nelson Co., VA         | Open    | 37.749   | -78.833   | 235.68 | C, A  | 10           |
| 338 | <i>D. meadia</i>       | Franklin Co., PA                            | Forest  | 39.727   | -78.062   | 323.13 | B     | 10           |
| 339 | <i>D. amethystinum</i> | Lancaster Central Park, Lancaster Co., PA   | Cliff   | 40.021   | -76.285   | 405.52 | B     | 10           |
| 340 | <i>D. amethystinum</i> | Columbia Co., PA                            | Cliff   | 40.949   | -76.483   | 344.35 | B     | 10           |
| 341 | <i>D. amethystinum</i> | Ray Norbut S.F.W.A., Pike Co., IL           | Cliff   | 39.662   | -90.642   | 252.31 | G     | 10           |
| 343 | <i>D. meadia</i>       | Freeport Prairie N.P., Stephenson Co., IL   | Open    | 42.277   | -89.622   | 151.01 | C     | 10           |
| 346 | <i>D. amethystinum</i> | Mississippi Palisades S.P., Carroll Co., IL | Cliff   | 42.129   | -90.158   | 275.49 | G     | 10           |
| 348 | <i>D. amethystinum</i> | Grant Co., WI                               | Cliff   | 42.852   | -91.072   | 318.27 | D     | 9            |
| 349 | <i>D. meadia</i>       | Hogback Prairies S.N.A., Crawford Co., WI   | Open    | 43.213   | -90.870   | 144.08 | D     | 10           |
| 350 | <i>D. amethystinum</i> | North Bear W.M.A., Winneshiek Co., IA       | Cliff   | 43.447   | -91.622   | 395.58 | C     | 10           |
| 351 | <i>D. amethystinum</i> | Perrot S.P., Trempleau Co., WI              | Cliff   | 44.016   | -91.480   | 256.90 | E     | 10           |
| 352 | <i>D. meadia</i>       | Hayden Prairie S.N.P., Howard Co., IA       | Open    | 43.438   | -92.386   | 147.11 | I     | 8            |
| 353 | <i>D. meadia</i>       | Cedar Co., IA                               | Open    | 41.665   | -91.140   | 282.82 | I     | 10           |

Collection numbers refer to the first author. cpDNA refers to *psbA-trnH*<sup>GUG</sup> haplotypes present in the populations as labeled in Fig. S1. Haplotypes A–J were deposited in the GenBank database under accession nos. HM778141–HM778150.
